# Supplementary material for: Experimental Combined Immunotherapy of Tumours with Major Histocompatibility Complex Class I Downregulation
Source: MDPI journal article supplement (doi:10.3390/ijms19113693), 2018-11-21

**Figure S1.** The anti-tumor effect of single vaccine adjuvants and Tim-3 blockade in DNA immunized mice. Mice (n=5) were injected s.c. with TC-1/A9 cells (day 0) and immunized 3 times by a gene gun with 2  $\mu$ g of pBSC/PADRE.E7GGG on days 3, 6, and 10. The empty plasmid pBSC was used as a negative control (A). Monoclonal antibody against Tim-3 was administered alone (A) or together with vaccine adjuvants – ODN1585 (B), LMS (C), ODN1826 (D), or  $\alpha$ -GalCer (E) – delivered on the days of immunization. No. of mice with a tumor/no. of mice in the group is indicated. Bars:  $\pm$ SEM; \*  $p < 0.05$ ; \*\*  $p < 0.01$ ; \*\*\* $p < 0.001$ . Statistical significance refers to the comparison with the group immunized with the PADRE.E7GGG gene. The experiment was repeated with similar results.

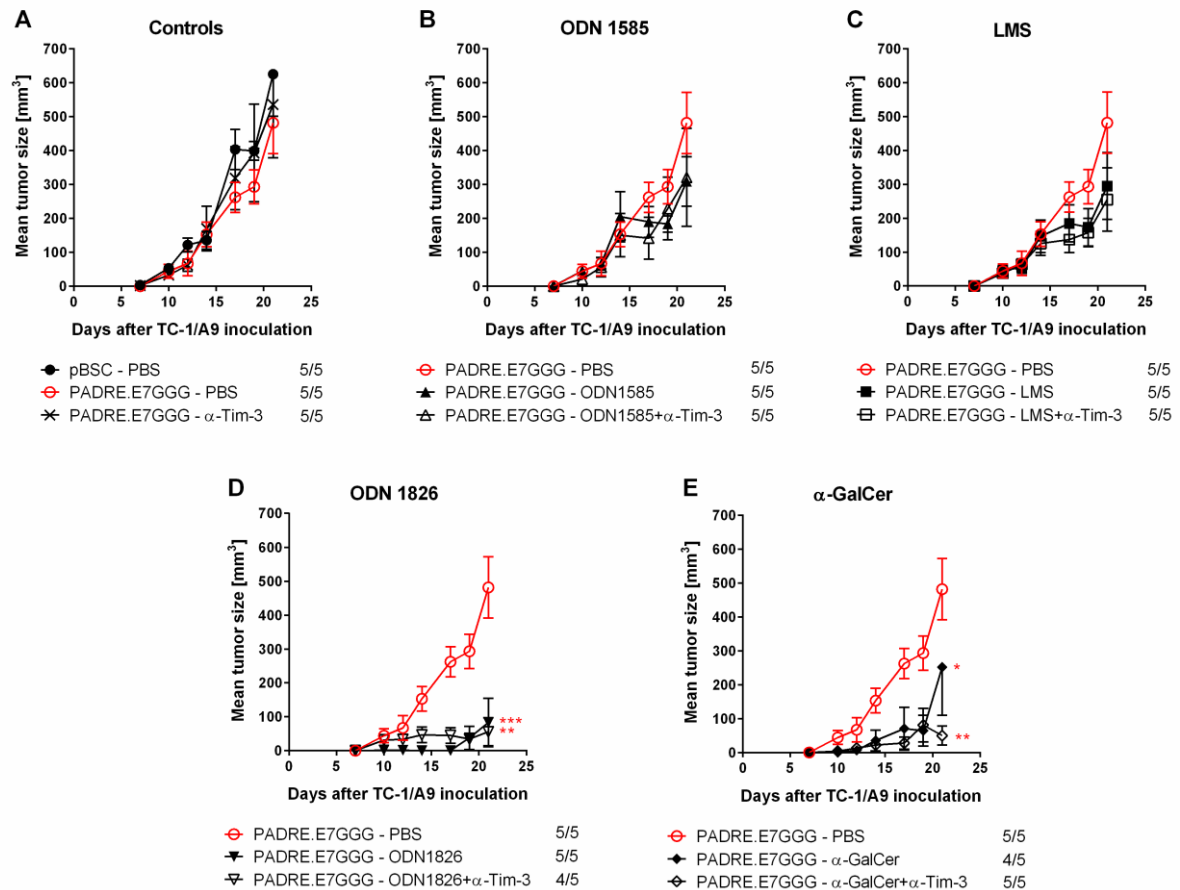

Supplement: s1 [file s1]
